# Supplementary material
Source: publisher site journal article supplement (https://www.dovepress.com/article/181363)
Supplement: Supplementary file 1 [file get_supplementary_file.php]

|                                                                                                                 |
|-----------------------------------------------------------------------------------------------------------------|
| <p align="center"><b>PROJET DE QUESTIONNAIRE</b><br/> <b>Perception des traitements par insuline basale</b></p> |
|-----------------------------------------------------------------------------------------------------------------|

|                                       | CIBLE                                                                                                       |
|---------------------------------------|-------------------------------------------------------------------------------------------------------------|
| <b>Target definition</b>              | Médecins                                                                                                    |
| <b>Number of completed interviews</b> | 130                                                                                                         |
| <b>Quotas</b>                         | Diabétologues : 50 %<br>(dont 50 % de praticiens hospitaliers- sur fichier)<br>Médecins généralistes : 50 % |
| <b>Dates de terrain</b>               | Du 12 au 25 novembre 2015                                                                                   |

Introduction

Bonjour,

Je suis XX de l'Institut Viavoice. Nous avons été mandatés par le laboratoire Lilly afin de réaliser une étude sur les perceptions relatives au passage à l'insuline parmi les patients diabétiques de type 2.

Nous souhaiterions recueillir vos perceptions et expérience à ce sujet et vous serions reconnaissants de bien vouloir répondre au questionnaire suivant qui ne vous prendra qu'une dizaine de minutes.

Cette démarche n'est en aucun cas une démarche commerciale et les informations recueillies resteront confidentielles.

**PARTIE SIGNALÉTIQUE**

**SCREENER MEDECINS**

**A TOUS**

**RS1 Etes-vous... ?**

1. Diabétologue / Endocrinologue
2. Médecin généraliste
3. Autre **(STOP INTER)**

**RS2. Pourriez-vous nous indiquer votre âge : /\_\_/\_\_/**

1. Moins de 35 ans
2. Entre 35 et 45 ans
3. Entre 46 et 50 ans
4. Entre 51 et 55 ans
5. 56 ans et plus

**RS3. Merci de nous indiquer le code postal de votre lieu d'exercice /\_\_\_\_\_/**

**Recode : Région UDA 5**

1. Région parisienne
2. Nord est
3. Nord-Ouest
4. Sud Est
5. Sud-Ouest

**AUX DIABETOLOGUES (SI RS1 = 1)**

**RS4. Depuis combien d'années exercez-vous en tant que diabétologue ?**

1. Moins de 10 ans
2. 11 à 20 ans
3. 21 à 40 ans
4. 40 ans et plus

**AUX MEDECINS GEN (SI RS1 = 2)**

**RS4. Depuis combien d'années exercez-vous en tant que médecin généraliste ?**

1. Moins de 10 ans
2. 11 à 20 ans
3. 21 à 40 ans
4. 40 ans et plus

**1. Perception de l'insuline :**

**Q1. Comment qualifieriez-vous avant tout le passage d'un traitement par antidiabétiques oraux à un traitement par insuline pour un patient atteint de diabète de type 2 ?**

*Plusieurs réponses possibles*

1. Un traitement efficace (une amélioration du contrôle glycémique, moins de complications)
2. Un traitement flexible (la possibilité d'adapter des doses en fonction du niveau de glycémie)
3. Un traitement plus contraignant dans ses modalités de prise que les traitements oraux (auto-injection, contrôle accru de la glycémie)
4. Un traitement ayant un retentissement social plus important que les traitements oraux (maladie plus difficile à cacher, vie sociale et voyages moins fréquents)
5. Un traitement présentant des risques d'hypoglycémie
6. Un traitement présentant un risque de prise de poids
7. Le signe d'une aggravation de la maladie
8. Le signe d'un passage au « vrai diabète »
9. Une étape inévitable de la maladie
10. Une autre raison (PRECISEZ)

*Objectif : reprise des items du questionnaire patients*

**2. Evocation de l'insuline :**

**Q2. Dans le cadre du suivi d'un patient atteint de diabète de type 2, à quelle étape du traitement évoquez-vous le traitement par insuline (le plus souvent) ?**

1. Au moment du diagnostic de diabète
2. Au moment de la prescription du premier traitement
3. Au moment de l'intensification du traitement oral
4. Au moment de la prescription d'un traitement injectable autre que l'insuline
5. Au moment de débiter le traitement par insuline
6. Un autre moment (PRECISEZ)

**Q3. A ce moment-là, en quels termes en parlez-vous généralement ?**

*Plusieurs réponses possibles*

1. Une option de traitement à envisager un jour
2. Une alternative permettant un meilleur contrôle de la maladie, plus efficace que les autres traitements
3. Une option à repousser le plus possible
4. Une option inévitable au vu de l'évolution de la maladie
5. Une menace en cas de mauvaise observance
6. Un traitement qui est plus flexible (adaptation des doses à la glycémie)
7. La prochaine étape du traitement

*Objectif de ces deux questions : lecture croisée des raisons citées lors des différents moments d'évocation.*

**Q3 Bis. Au-delà des termes précédents, utilisez-vous également d'autres termes pour parler de l'insuline, si oui lesquels ?**

*Merci d'indiquer tous les éléments auxquels vous pensez*

/ \_\_\_\_\_ /

**Q4. Combien de temps est selon vous nécessaire pour qu'un diabétique de type 2 accepte l'idée d'un traitement par insuline ?**

**MENU DEROULANT (SEMAINES ET MOIS)**

**Q5. Quelles sont les principales craintes de vos patients à débiter un traitement par insuline ?**

*Plusieurs réponses possibles*

1. Crainte de la pique et/ou de s'injecter eux-mêmes
2. Crainte du traitement à vie
3. Crainte de l'installation de la maladie
4. Sentiment d'échec vis-à-vis de ses traitements /efforts passés
5. Crainte de complications liées à l'insuline (prise de poids, hypoglycémie)
6. Crainte de complications liées à la maladie (amputation, cécité)
7. Autre crainte (PRECISEZ)
8. Aucune

*Objectif : reprise des items du questionnaire patients*

**Q6. Pour 10 patients auxquels vous proposez de passer à l'insuline, pour combien d'entre eux diriez-vous que vous rencontrez des difficultés importantes lors de cette proposition (quelques soient le type de difficultés considérées) :**

/ \_ \_ /

**(PROG 0 à 10)**

**Q7. Quelles sont les principales difficultés que vous rencontrez à votre niveau lors de la proposition de passer à l'insuline ?**

*Merci d'indiquer tous les éléments auxquels vous pensez*

/ \_\_\_\_\_ /

### 3. Supports d'information délivrés :

#### Q8. Lors de la prescription d'un traitement par insuline, proposez-vous l'un des supports suivants ?

*Plusieurs réponses possibles*

1. Votre aide personnelle pour l'apprentissage
2. Une ou plusieurs brochure(s) d'information sur l'insulinothérapie en général
3. Une ou plusieurs brochure(s) sur la manipulation du stylo et la réalisation de l'injection
4. Des adresses de sites internet
5. Un lien vers une association de patients ou un réseau de soins
6. La prescription de soins infirmiers au domicile du patient
7. Un numéro de téléphone du service de diabétologie qui suit le patient
8. Une éducation par une autre personne lors d'une session de groupe
9. Une éducation par une autre personne lors d'une session individuelle
10. Un autre moyen d'information (PRECISEZ)
11. Aucun moyen d'information
12. Une aide psychologique

#### Q10. Lors de la prescription d'un traitement par insuline, sur quel élément d'information insistez-vous ?

*Plusieurs réponses possibles*

##### Informations générales sur le principe même du traitement par insuline :

1. Les raisons du passage à l'insuline
2. Le rôle de l'insuline et comment elle agit
3. Les objectifs glycémiques que le patient devrait atteindre

##### La manipulation du stylo :

4. La prise en main du stylo (découverte et présentation du stylo)
5. Où s'injecter et à quel moment? (les sites d'injection, choix du moment de l'injection)
6. Comment réaliser l'injection (purge, temps d'injection, ...)
7. Comment conserver l'insuline (Les règles de conservation de l'insuline)

##### L'ajustement des doses d'insuline :

8. Comment effectuer l'auto-surveillance glycémique et analyser les résultats
9. Comment adapter les doses d'insuline
10. Quelles sont les situations à risque d'hypoglycémie
11. Que faire en cas d'hypoglycémies

##### Vivre avec au quotidien :

12. Que faire en cas d'oubli
13. L'impact sur la gestion de mon activité physique
14. L'impact sur la gestion de mon alimentation
- Une autre information (précisez)

*Objectif : reprise des items du questionnaire patients*

#### Q11. Le fait de vous appuyer sur les éléments suivants vous paraît-il ?

... un programme d'éducation thérapeutique  
... le partage d'expérience de vos pairs et des équipes

1. Très utile
2. Plutôt utile
3. Pas vraiment utile
4. Pas du tout utile
5. Ne se prononce pas.

**Si lieu d'exercice en Ile-de-France :**

Dans le cadre de cette étude, nous souhaitons recueillir des témoignages de patients concernés par le sujet afin d'enrichir notre analyse.

Accepteriez-vous qu'un responsable Viavoice de l'étude vous recontacte afin de vous expliquer plus en détail la démarche d'étude et puisse être mis en contact avec des patients intéressés ?

Si oui – prise de contact téléphonique ou mail

**REMERCIEMENTS**

|                                                                                                                  |
|------------------------------------------------------------------------------------------------------------------|
| <p align="center"><b>PROJET DE QUESTIONNAIRE</b><br/> <b>Perceptions des traitements par insuline basale</b></p> |
|------------------------------------------------------------------------------------------------------------------|

|                                       | <b>CIBLE</b>                                                                                                             |
|---------------------------------------|--------------------------------------------------------------------------------------------------------------------------|
| <b>Target definition</b>              | Patients DT2                                                                                                             |
| <b>Number of completed interviews</b> | 600                                                                                                                      |
| <b>Quotas</b>                         | Sous traitement insulinique (insuline basale) : 67 %<br>(400 interviews)<br>Sous antidiabétiques : 33 % (200 interviews) |
| <b>Dates de terrain</b>               | Du 14 octobre 2015 au 30 octobre 2015                                                                                    |
| <b>Consignes de prog</b>              | A partir de la Q5 -> toutes les questions sont en non-obligatoires<br>Postes « Autres (PRECISEZ) » en obligatoire        |

**PARTIE SIGNALETIQUE**

**SCREENER GRAND PUBLIC : 18+**

**A TOUS**

**RS1 Etes-vous... ?**

1. Un homme
2. Une femme

**RS2 Quel est votre âge ?**

1. 18 à 24 ans
2. 25 à 34 ans
3. 35 à 49 ans
4. 50 à 59 ans
5. 60 ans et plus

**RS3 Dans quel département habitez-vous ?**  
(Il s'agit du département où se situe votre résidence principale)

**MENU DEROULANT**

**RECOD UDA5 ET CAT. D'AGGLO**

**RS4 Actuellement, exercez-vous une activité professionnelle ?**

- 1 Oui
- 2 Non, chômeur ayant déjà travaillé
- 3 Non, retraité ou préretraité
- 4 Non, à la recherche d'un premier emploi
- 5 Non, élève, étudiant
- 6 Non, femme au foyer
- 7 Non, sans profession

**RS6 Quelle est votre profession actuelle ?**

ou

**RS6b Quelle est la dernière profession que vous avez exercée?**

**RECOD SELON CSP**

## SCREENER PATIENT DT2

**Q1. Pourriez-vous indiquer à quelle date votre diabète de type 2 a été diagnostiqué ?**

**MENU DEROULANT (MOIS ET ANNEE)**

**Q2. Quel traitement prenez-vous actuellement dans le cadre de votre diabète ?**

*Plusieurs réponses possibles*

1. Un traitement par antidiabétiques oraux
2. Un traitement par injection d'insuline
3. Un autre traitement injectable du diabète ➔ **STOP INTER**

**MULTICHOIX POSSIBLE :**

**SI REP 1 OU REP 1 & 3 ALORS PATIENTS SOUS ANTIDIAB.ORAUX,**

**SI REP 1 & 2 OU 2 ALORS PATIENTS SOUS INSULINE**

**SI 3 uniquement : STOP INTER**

## PATIENTS TRAITES PAR INSULINE (SI MINIMUM CODE 2 EN Q2)

**Q3 Depuis combien de temps êtes-vous traités par insuline ?**

**MENU DEROULANT (MOIS ET ANNEE – JUSQU'A 99)**

**STOP INTER SI INFERIEUR A DEUX MOIS**

**Q3b. Avez-vous reçu auparavant, hors de l'insuline, un autre traitement par injection pour traiter votre diabète ?**

1. Oui
2. Non

**Q3c. Quel type d'insuline vous est actuellement prescrit ?**

*Plusieurs réponses possibles*

1. Lantus (insuline glargine)
2. Levemir (insuline detemir)
3. Humalog (insuline lispro) ➔ **STOP INTER**
4. Novorapid (insuline asparte) ➔ **STOP INTER**
5. Apidra (insuline glulisine) ➔ **STOP INTER**
6. Autres ➔ **STOP INTER**

**CODES 1 & 2 ONLY – SINON STOP INTER**

**PATIENTS SOUS ANTIDIAB. ORAUX (SI Q2 ≠ 2)**

**Q4 Combien de traitements oraux vous sont actuellement prescrits ?**

*Nous parlons ici du nombre de médicaments oraux différents pris pour traiter votre diabète et non du nombre de comprimés pris par jour pour un traitement particulier*

/\_/\_/

**(PROG 0 à 99)**

**Q4b. Avez-vous reçu auparavant, hors de l'insuline, un autre traitement par injection pour traiter votre diabète ?**

1. Oui
2. Non

## CHAPITRE I / AVANT LE PASSAGE A L'INSULINE

### A TOUS

#### 1. Découverte du diabète

**Q5. Au moment du premier diagnostic de diabète de type 2, à quelles conséquences avez-vous pensé à l'annonce de votre diabète de type 2 ?**

Objectif : aborder plus largement toutes les craintes et les phantasmes lors de l'annonce afin de voir si les injections d'insuline y figurent

*Noter ci-dessous tous les éléments auxquels vous pensez*

/ \_\_\_\_\_ (Question ouverte) \_\_\_\_\_ /

### PATIENTS SOUS ANTIDIAB. ORAUX (SI Q2 ≠ 2)

#### 2. Perception et évaluation des traitements oraux :

**Q6b. Quel est actuellement votre niveau global de satisfaction vis-à-vis de vos traitements oraux concernant... ?**

- ... l'efficacité du traitement
- ... les modalités de prise
- ... les effets secondaires

*Une réponse possible*

1. Très satisfait
2. Plutôt satisfait
3. Peu satisfait
4. Pas du tout satisfait

**Q7b. Et comment jugez-vous ...**

- L'équilibre de votre alimentation
- Votre niveau de fatigue
- L'évolution de votre poids
- Les modalités de prise de vos traitements (horaires, nombre de prise, administration)
- L'intégration du traitement dans votre quotidien
- La régularité avec laquelle vous prenez votre traitement

1. Très convenable
2. Plutôt convenable
3. Peu convenable
4. Pas du tout convenable

### **3. Perception de l'insuline :**

**QXb. En quelques mots, l'insuline, c'est quoi pour vous ?**

*Noter ci-dessous tous les éléments auxquels vous pensez*

/ \_\_\_\_\_ (Question ouverte) \_\_\_\_\_ /

**Q8b. Parlons maintenant des traitements par insuline. Comment qualifieriez-vous la nature et l'intensité de vos sentiments par rapport à ce traitement ?**

**PRÉSENTER UN CURSEUR AVEC NOTE DE 0 A 10 POUR CHAQUE ITEM  
PROG IDENTIQUE Q8a.**

1. Rassurant
2. Souhaité
3. Angoissant
4. Culpabilisant
5. Indifférent

**Q9b. Quelle(s) idée(s) vous faites-vous du traitement par insuline?**

**PROG IDENTIQUE Q9a.**

*Plusieurs réponses possibles*

1. Un traitement efficace (amélioration du contrôle glycémique, moins de complications)
2. Un traitement flexible avec la possibilité d'adapter les doses en fonction des besoins
3. Un traitement plus contraignant en termes de modalités de prise (auto-injection, contrôle accrue de la glycémie)
4. Un traitement ayant un retentissement social plus important (maladie plus difficile à cacher, vie sociale et voyages moins fréquents)
5. Un traitement présentant des risques d'hypoglycémie
6. Un traitement présentant un risque de prise de poids
7. Le signe d'une aggravation de la maladie
8. Le signe d'un passage à un « vrai diabète »
9. Une étape inévitable de la maladie
10. Une autre raison (PRÉCISEZ)

### **4. Image de l'insuline :**

**Q10b. Votre médecin a-t-il déjà évoqué avec vous le traitement par insuline ?**

*Une réponse possible*

1. Oui
2. Non

|                             |
|-----------------------------|
| <b>SI OUI (SI Q10B = 1)</b> |
|-----------------------------|

**Q11b. A quel moment, votre médecin a-t-il commencé pour la première fois à vous parler du traitement par insuline ?**

*Une réponse possible*

1. Au moment de votre diagnostic
2. Au moment de la prescription de votre premier traitement
3. Au moment de l'ajout d'un autre traitement oral
4. Au moment de la prescription d'un traitement injectable autre que l'insuline
5. Votre médecin vous a proposé de débiter l'insuline
6. Un autre moment (PRECISEZ)

**Q12. A ce moment-là, en quels termes votre médecin vous a-t-il parlé de l'insuline ?**

*Plusieurs réponses possibles*

1. Une option de traitement à envisager un jour
2. Une option permettant un meilleur contrôle de la maladie, plus efficace que les autres traitements
3. Une option à repousser le plus tard possible
4. Une option inévitable au vue de l'évolution de la maladie
5. Une sanction / une menace en cas de mauvaise régularité des prises de vos médicaments
6. Un traitement qui est plus flexible (adaptation des doses à la glycémie)
7. La prochaine étape du traitement

**PATIENTS SOUS INSULINE (SI MINIMUM CODE 2 EN Q2)**

**2. Perception et évaluation des traitements oraux :**

**Q6a. Avant le passage aux traitements par insuline, quel était votre niveau global de satisfaction vis-à-vis de vos traitements oraux concernant... ?**

... l'efficacité du traitement  
... les modalités de prise  
... les effets secondaires

1. Très satisfait
2. Plutôt satisfait
3. Peu satisfait
4. Pas du tout satisfait

**Q7a. Lorsque vous aviez uniquement des traitements oraux, comment jugiez-vous ...**

- L'équilibre de votre alimentation
- Votre niveau de fatigue
- L'évolution de votre poids
- Les modalités de prise de vos traitements (horaires, nombre de prise, administration)
- L'intégration du traitement dans votre quotidien
- La régularité avec laquelle vous preniez votre traitement

1. Très convenable
2. Plutôt convenable
3. Peu convenable
4. Pas du tout convenable

**3. Perception de l'insuline avant l'initiation de celle-ci :**

**QXa. En quelques mots, l'insuline, c'est quoi pour vous ?**

*Noter ci-dessous tous les éléments auxquels vous pensez*

/ \_\_\_\_\_ (Question ouverte) \_\_\_\_\_ /

**Q8a. Rétrospectivement et avant de recevoir un traitement par insuline, comment qualifieriez-vous la nature et l'intensité de vos sentiments par rapport à ce traitement ?**

**PRESENTER UN CURSEUR AVEC NOTE DE 0 A 10 POUR CHAQUE ITEM**

1. Rassurant
2. Souhaité
3. Angoissant
4. Culpabilisant
5. Indifférent

**Q9a. Plus précisément, quelle(s) idée(s) vous faisiez vous du traitement par insuline ?**

*Plusieurs réponses possibles*

11. Un traitement efficace (amélioration du contrôle glycémique, moins de complications)
12. Un traitement flexible avec la possibilité d'adapter les doses en fonction des besoins
13. Un traitement plus contraignant en termes de modalités de prise (auto-injection, contrôle accrue de la glycémie)
14. Un traitement ayant un retentissement social plus important (maladie plus difficile à cacher, vie sociale et voyages moins fréquents)
15. Un traitement présentant des risques d'hypoglycémie
16. Un traitement présentant un risque de prise de poids
17. Le signe d'une aggravation de la maladie
18. Le signe d'un passage à un « vrai diabète »
19. Une étape inévitable de la maladie
20. Une autre raison (PRECISEZ)

**4. Image de l'insuline :**

**Q11a. A quel moment, votre médecin a-t-il commencé pour la première fois à vous parler du traitement par insuline ?**

*Une réponse possible*

7. Au moment de votre diagnostic
8. Au moment de la prescription de votre premier traitement
9. Au moment de l'ajout d'un autre traitement oral
10. Au moment de la prescription d'un traitement injectable autre que l'insuline
11. Au moment où votre médecin vous a proposé de débiter le traitement par insuline
12. Un autre moment (PRECISEZ)

**Q12. En quels termes votre médecin vous a-t-il parlé de l'insuline :**

*Plusieurs réponses possibles*

1. Une option de traitement à envisager un jour
2. Une option permettant un meilleur contrôle de la maladie, plus efficace que les autres traitements
3. Une option à repousser le plus tard possible
4. Une option inévitable au vue de l'évolution de la maladie
5. Une sanction / une menace en cas de mauvaise régularité des prises de vos médicaments
6. Un traitement qui s'adapte / qui est plus flexible (adaptation des doses à la glycémie)
7. La prochaine étape du traitement

**CHAPITRE II / LE PASSAGE A L'INSULINE**

**Q15. Après que votre médecin vous ait annoncé la nécessité de passer à l'insuline, de combien de temps avez-vous eu besoin pour accepter de débiter/recevoir ce traitement ?**

**MENU DEROLANT (SEMAINES ET MOIS)**

**PATIENTS SOUS INSULINE (SI MINIMUM CODE 2 EN Q2)  
ET  
PATIENTS SOUS ANTIDIAB. ORAUX SI Q10B = 1 ET Q11B = 5**

**Q16. Parmi les situations suivantes, de laquelle (desquelles) étiez-vous le plus proche au moment de la cette proposition de débiter le traitement par insuline?**

*Plusieurs réponses possibles*

1. J'ai fait confiance à mon médecin (sur le meilleur choix qui s'imposait)
2. Mon médecin m'a laissé le temps de la réflexion / m'a laissé me faire à l'idée
3. J'ai eu besoin d'en parler avec mon entourage
4. Je me suis documenté sur le traitement
5. J'ai tout fait pour retarder l'initiation de ce traitement
6. J'ai modifié mon hygiène de vie pour éviter ce traitement
7. J'ai amélioré la régularité avec laquelle je prenais mes comprimés pour éviter ce traitement

**Q17. Quelle ont été vos principales craintes ?**

*Plusieurs réponses possibles*

9. Crainte de la piqure et/ou de m'injecter moi-même
10. Crainte du traitement à vie
11. Crainte de l'installation de la maladie
12. Sentiment d'échec vis-à-vis de mes traitements /efforts passés
13. Crainte de complications liées à l'insuline (prise de poids, hypoglycémie)
14. Crainte de complications liées à la maladie (amputation, cécité)
15. Autre crainte (PRECISEZ)
16. Aucune

**PATIENTS SOUS INSULINE (SI MINIMUM CODE 2 EN Q2)**

**Q18. Au moment de la prescription initiale de votre traitement par insuline, comment qualifiez-vous en nature et en intensité vos sentiments vis-à-vis de ce traitement par insuline?**

**PRESENTER UN CURSEUR AVEC NOTE DE 0 A 10 POUR CHAQUE ITEM  
PROG IDENTIQUE Q8a.**

1. Rassurant
2. Souhaité
3. Angoissant
4. Culpabilisant
5. Indifférent

**2. Niveau d'information :**

**Q19. Lors de la prescription initiale de votre traitement par insuline, votre médecin vous a-t-il proposé?**

*Plusieurs réponses possibles*

13. Son aide personnelle pour l'apprentissage
14. Une ou plusieurs brochure(s) d'information générale sur l'insulinothérapie
15. Une ou plusieurs brochure(s) sur la manipulation du stylo et la réalisation de l'injection
16. Des adresses de sites internet
17. Un lien vers une association de patients ou un réseau de soins
18. La prescription de soins infirmiers à domicile
19. Un numéro de tel du service de diabétologie qui vous suit
20. Une éducation par une autre personne lors d'une session de groupe

- 21. Une éducation par une autre personne lors d'une session individuelle
- 22. Un autre moyen d'information (PRECISEZ)
- 23. Aucun moyen d'information

**3. Proposition vs acceptation des supports d'aide extérieur : Session d'apprentissage ou prescription de soins infirmiers**

**SI Q19 = 6 → Q23. Avez-vous accepté de bénéficier de la prescription de soins infirmiers lors de la prescription de votre insuline ?**

*Une réponse possible*

- 1. Oui
- 2. Non

**SI Q19 = 8 ou 9 → Q23b. Avez-vous accepté de bénéficier de e l'éducation par une autre personne en groupe ou en session individuelle lors de la prescription de votre insuline ?**

*Une réponse possible*

- 1. Oui
- 2. Non

**Q26. Pourquoi n'avez-vous pas accepté ?**

*Plusieurs réponses possibles*

1. L'insuline ne me semblait pas si difficile
2. C'est finalement un traitement comme les « autres »
3. J'avais déjà reçu un traitement par injection et savais m'injecter
4. Je n'en voyais pas l'utilité
5. Je savais que je ne ferai pas l'injection de toute façon et que quelqu'un d'autre pratiquerait l'injection.
6. Je ne pouvais pas participer (manque de temps, horaires ou lieu non adaptés)
7. Autres (PRECISEZ)

**Q27. Avec le recul, avez-vous regretté votre choix de ne pas accepter [la prescription de soins infirmiers] et/ou[l'éducation par une autre personne]?**

*Une réponse possible*

1. Oui
2. Non

**4. Informations et explications reçues lors de la mise sous insuline :**

**Q28. Lorsque votre insuline vous a été prescrite votre insuline, quels les éléments vous ont été présentés d'une façon ou d'une autre?**

*Plusieurs réponses possibles*

**Information générales sur le principe même du traitement par insuline:**

15. Les raisons du passage à l'insuline
16. Le rôle de l'insuline et comment elle agit
17. Les objectifs glycémiques que vous deviez atteindre

**La manipulation du stylo :**

18. La prise en main du stylo (découverte et présentation du stylo)
19. Où m'injecter et à quel moment (les sites d'injection et choix du moment)
20. Comment réaliser mon injection (purge, temps d'injection, ...)
21. Comment conserver mon insuline (Les règles de conservation de l'insuline)

**L'ajustement des doses d'insuline :**

22. Comment effectuer son auto-surveillance glycémique et analyser les résultats
23. Comment adapter mes doses d'insuline
24. Quelles sont les situations à risque d'hypoglycémie
25. Que faire en cas d'hypoglycémies

**Vivre avec au quotidien :**

26. Que faire en cas d'oubli
27. L'impact sur la gestion de mon activité physique
28. L'impact sur la gestion de mon alimentation
29. Une autre information (PRECISEZ)

**Q29. En reprenant la liste que précédente, comment jugeriez-vous de l'utilité qu'ont eu ou qu'auraient eu ces informations au début du traitement par insuline (pour en faciliter la mise en place)**

**PROG IDENTIQUE Q28**

**PROG : NE PAS LIMITER LE NB DE REPONSES**

*Indiquez quelles informations vous apparaissent comme prioritaires*

*Plusieurs réponses possibles*

**Information générales sur le principe même du traitement par insuline :**

1. Les raisons du passage à l'insuline
2. Le rôle de l'insuline et comment elle agit
3. Les objectifs glycémiques que vous deviez atteindre

**La manipulation du stylo :**

4. La prise en main du stylo (découverte et présentation du stylo)
5. Où m'injecter et à quel moment (les sites d'injection et choix du moment)
6. Comment réaliser mon injection (purge, temps d'injection, ...)
7. Comment conserver mon insuline (Les règles de conservation de l'insuline)

**L'ajustement des doses d'insuline :**

8. Comment effectuer son auto-surveillance glycémique et analyser les résultats
9. Comment adapter mes doses d'insuline
10. Quelles sont les situations à risque d'hypoglycémie
11. Que faire en cas d'hypoglycémies

**Vivre avec au quotidien :**

12. Que faire en cas d'oubli
13. L'impact sur la gestion de mon activité physique
14. L'impact sur la gestion de mon alimentation
15. Une autre information, précisez

**5. Le retour à la maison :**

**Q30. Qui a pratiqué la première injection de traitement par insuline à domicile ?**

*Une réponse possible*

1. Vous-même
2. Un proche (conjoint,...)
3. Une infirmière à domicile
4. Autre (PRECISEZ)

|                        |
|------------------------|
| <b>SI Q30 = 1 OU 2</b> |
|------------------------|

**Q31. Comment vous sentiez-vous lors de la première injection à la maison ?**

*Une réponse possible*

1. Très mal à l'aise
2. Plutôt mal à l'aise
3. Plutôt à l'aise
4. Extrêmement à l'aise

**Q32. Avec le recul, qu'est-ce qui vous a paru le plus difficile lorsque vous avez débuté votre traitement ?**

**PROG IDENTIQUE Q28**

**PROG : NE PAS LIMITER LE NB DE REPONSES**

*Indiquez quelles informations vous apparaissent comme prioritaires*

*Plusieurs réponses possibles*

**Information générales :**

1. Les raisons du passage à l'insuline
2. Le rôle de l'insuline et comment elle agit
3. Les objectifs glycémiques que vous deviez atteindre

**La manipulation du stylo :**

4. La prise en main du stylo (découverte et présentation du stylo)
5. Où m'injecter et à quel moment (les sites d'injection et choix du moment)
6. Comment réaliser mon injection (purge, temps d'injection, ...)
7. Comment conserver mon insuline (Les règles de conservation de l'insuline)

**L'ajustement des doses d'insuline :**

8. Comment effectuer son auto-surveillance glycémique et analyser les résultats
9. Comment adapter mes doses d'insuline
10. Quelles sont les situations à risque d'hypoglycémie
11. Que faire en cas d'hypoglycémies

**Vivre avec au quotidien :**

12. Que faire en cas d'oubli
13. L'impact sur la gestion de mon activité physique
14. L'impact sur la gestion de mon alimentation
15. Une autre information, précisez

**Q33. Lors de ce passage vers votre traitement par insuline, quel a été le rôle joué par votre entourage ?**

*Plusieurs réponses possibles*

1. Un soutien psychologique / du réconfort
2. Une aide pratique pour m'aider à m'injecter l'insuline
3. Une aide pratique pour adapter les doses
4. Un soutien dans la surveillance des hypoglycémies
5. Aucune aide particulière

**Q34. Vous êtes actuellement traité par insuline depuis X mois. Quel est maintenant votre niveau de satisfaction vis-à-vis de votre traitement par insuline concernant ...**

**PROG IDENTIQUE Q6a.**

**REPRENDRE REP Q3 pour l'intitulé**

**... l'efficacité du traitement**

**... les modalités de prise**

**... les effets secondaires**

1. Très satisfait
2. Plutôt satisfait
3. Peu satisfait
4. Pas du tout satisfait

**Q35. Aujourd'hui, avec le recul, comment jugez-vous...**

**PROG IDENTIQUE Q7a.**

- L'équilibre de votre alimentation
  - Votre niveau de fatigue
  - L'évolution de votre poids
  - Les modalités de prise de vos traitements (horaires, posologie, administration)
  - L'intégration du traitement dans votre quotidien
  - La régularité avec laquelle vous prenez votre traitement
1. Très convenable
  2. Plutôt convenable
  3. Peu convenable
  4. Pas du tout convenable

**Q36. Finalement aujourd'hui, comment qualifieriez-vous la nature et l'intensité de vos sentiments par rapport à ce traitement?**

**PRESENTER UN CURSEUR AVEC NOTE DE 0 A 10 POUR CHAQUE ITEM**

**PROG IDENTIQUE Q7a.**

1. Rassurant
2. Souhaité
3. Angoissant
4. Culpabilisant
5. Indifférent

**Q37.Plus précisément, quelle(s) perception(s) avez-vous aujourd'hui de votre traitement par insuline ?**

*Plusieurs réponses possibles*

**PROG IDENTIQUE Q9a.**

1. Un traitement efficace (une amélioration du contrôle glycémique, moins de complications)
2. Un traitement flexible (la possibilité d'adapter les doses en fonction des besoins)
3. Un traitement plus contraignant, que votre traitement antérieur en termes de modalités de prise (auto-injection, contrôle accrue de la glycémie)
4. Un traitement contraignant en termes de retentissement social (maladie plus difficile à cacher, vie sociale et voyages moins fréquents)
5. Un risque d'hypoglycémie
6. Un risque de prise de poids
7. Le signe d'une aggravation de la maladie
8. Le signe d'un passage à un « vrai diabète »
9. Une étape inévitable de la maladie
10. Une autre raison (PRECISEZ)

**Q37b. Parmi les idées que l'on peut avoir généralement sur l'insuline avant sa mise en place, quelles sont celles a posteriori qui vous semble le plus contestables ?**

*Plusieurs réponses possibles*

**PROG IDENTIQUE Q9a.**

1. Un traitement efficace (une amélioration du contrôle glycémique, moins de complications)
2. Un traitement flexible (la possibilité d'adapter les doses en fonction des besoins)
3. Un traitement plus contraignant, que votre traitement antérieur en termes de modalités de prise (auto-injection, contrôle accrue de la glycémie)
4. Un traitement contraignant en termes de retentissement social (maladie plus difficile à cacher, vie sociale et voyages moins fréquents)
5. Un risque d'hypoglycémie
6. Un risque de prise de poids
7. Le signe d'une aggravation de la maladie
8. Le signe d'un passage à un « vrai diabète »
9. Une étape inévitable de la maladie
10. Une autre raison (PRECISEZ)

**Q38. Avec le recul et comparativement à ce que vous imaginiez avant de ce type de traitement, l'expérience du passage à l'insuline vous paraît-elle globalement ?**

*Une réponse possible*

1. Plus difficile que ce que j'imaginais
2. Aussi difficile que ce que j'imaginais
3. Moins difficile que ce que j'imaginais

**Q39. Quels conseils ou informations donneriez-vous à un proche qui demain doit passer à l'insuline ?**

*Noter ci-dessous tous les éléments auxquels vous pensez*

/ \_\_\_\_\_ (Question ouverte) \_\_\_\_\_ /

|                      |
|----------------------|
| <b>REMERCIEMENTS</b> |
|----------------------|
